# Supplementary material for: Clinical Characteristics, Racial Inequities, and Outcomes in Patients with Breast Cancer and COVID-19: A COVID-19 and Cancer Consortium (CCC19) Cohort Study
Source: PubMed Central journal article supplement (PMC10187350; doi:10.1101/2023.03.09.23287038), 2023-03-10
Supplement: NIHPP2023.03.09.23287038v1-supplement-1.pdf [file NIHPP2023.03.09.23287038v1-supplement-1.pdf]

574 **Supplementary Appendix**

575 **TABLE OF CONTENTS**

576

577 **APPENDIX A: CCC-19 Quality Scores** **Page: 6**

578

579 **APPENDIX B: Breast Cancer Disparities Statistical Analysis Plan:** **Pages: 7-13**

580

581 **APPENDIX C: CCC19 Approved Project Variables** **Pages:14-20**

582

583 **APPENDIX D: Supplementary Figure I - Proportional Odds Assumption** **Page:21**

584

585 **APPENDIX E: Suppl Table I – Unadjusted rates of outcomes after**  
586 **COVID-19 diagnosis by cancer status** **Page:22**

587

588 **APPENDIX F: Suppl Table IIA and IIB: Baseline Characteristics of Females**  
589 **with MBC and unadjusted rates of outcomes after COVID-19 diagnosis** **Pages: 23-26**

590

591 **APPENDIX G: Suppl Table III: Sensitivity Analysis by Race/Ethnicity** **Page: 27**

592

593 **APPENDIX H: Suppl Table IVA & IVB - Male Breast Cancer** **Pages: 28-30**

594

595 **APPENDIX I: List of Participants by Institution** **Pages: 31-34**

596

597

598

599

600

601

602

603

604

605

606

607 **APPENDIX A: CCC-19 Quality Scores**

608

609 The CCC-19 uses a quality scoring system to determine the suitability of records for inclusion in analyses. A score greater  
610 than 5 was considered insufficient for inclusion in the analysis presented. Scores are tabulated as follows:

611

**Minor problems (+1 points per problem)**

ADT missing/unknown (prostate cancers only)  
Biomarkers missing/unknown (breast cancers only)  
ICU admission missing/unknown  
Hospitalization missing/unknown  
Mechanical ventilation missing/unknown  
O2 ever needed missing/unknown  
Days to death missing/unknown  
Cancer status unknown  
ECOG PS unknown  
Missing cancer drug names for patients on systemic anti-cancer treatment  
Missing or unknown categorical lab values if labs were drawn

**Moderate problems (+3 points per problem)**

Cancer status missing  
ECOG PS missing  
Death status missing/unknown  
Baseline COVID-19 severity missing/unknown  
Should have 30-day follow-up but doesn't

**Major problems (+5 points per problem)**

High levels of missingness  
High levels of unknowns

612

613

614

615

616

617

618

619

620

621

622

623

624

625

626 **APPENDIX B: Breast Cancer Disparities Statistical Analysis Plan:**

627

628 Approved Project Title: **Racial and Ethnic Disparities among Patients with Breast Cancer and COVID-19 in CCC19**  
629 **Cohort**

630

631

632 Project Team Leads: Gayathri Nagaraj, Melissa Accordini, Maryam Lustberg, Dimpy Shah

633

634 Name of the investigator completing this survey: Gayathri Nagaraj and Melissa Accordini

635

636 Proposed milestone deadline for this manuscript:

637 • Abstract submission for ASCO 2021, deadline February 17 completed.

638 • ASCO abstract accepted for oral presentation. Deadlines for prelim slide upload May 7, and final deadline for  
639 uploading slides May 14.

640 • Manuscript preparation simultaneously, deadline and journal TBD

641 Do you have local statistical support: No

642

643 Name and emails of (at most) 2 additional project team members who would like to be part of the analysis team for the  
644 project:

645 Melissa Accordini, Email: [mkg2134@cumc.columbia.edu](mailto:mkg2134@cumc.columbia.edu)

646 Maryam Lustberg, Email: [Maryam.Lustberg@osumc.edu](mailto:Maryam.Lustberg@osumc.edu)

647 Dimpy Shah, Email: [shahdp@uthscsa.edu](mailto:shahdp@uthscsa.edu)

648

649 Initial draft of the Statistical Analysis Plan (SAP), following STROBE guidelines, for our review and input. Please complete  
650 sections 1 and 3-11 (and 12 if you have local statistical support)

651

652 **1 (a) Manuscript Title:** **Racial and Ethnic Disparities among Patients with Breast Cancer and COVID-19 in CCC19**  
653 **Cohort**

654

655 **1 (b) Provide in the abstract an informative and balanced summary of what was done and what will be found.**

656

657 Racial and Ethnic minority subgroups are at a disproportionately increased risk of contracting COVID-19 or experiencing  
658 severe illness regardless of age. Racial and Ethnic disparities also affect breast cancer incidence and mortality. The impact of  
659 COVID-19 on patients with breast cancer is largely unknown but is currently under investigation. Outcomes of COVID-19  
660 specifically in racial and ethnic minority patients with active or prior history of breast cancer is currently unknown.

661 **3. Objectives**

662 State specific objectives, including any prespecified hypotheses:

663

664 **The overarching goal** of this study is to evaluate the racial and ethnic disparities related to COVID-19 outcomes, in patients  
665 with active or previous history of breast cancer. To evaluate this, the following specific aims are proposed:

666

- 667 • **Specific Aim 1: To compare the distribution of major clinical, sociodemographic, and breast cancer risk**  
668 **factors among racial and ethnic subgroups of women with active or previous history of single primary**  
669 **invasive breast cancer diagnosed with COVID-19.**

670 We *hypothesize* that racial and ethnic minority women with breast cancer are more likely to have active comorbid  
671 conditions, such as diabetes mellitus, obesity, smoking history, and a baseline lower performance status compared to  
672 non-Hispanic white (NHW) women with active or previous history of breast cancer diagnosed with COVID-19.  
673 Other variables of interest are age, month/year of COVID-19 diagnosis, area of patient residence, geographic region,  
674 insurance type, treatment center characteristics, receipt of anti-COVID-19 treatment along with tumor characteristics  
675 including breast cancer biologic subtype, cancer status, treatment intent, timing of anti-cancer treatment and  
676 modality of anti-cancer treatment.

677

- 678 • **Specific Aim 2: To compare COVID-19 clinical outcomes on a five-level ordinal scale based on patient's most**  
679 **severe reported outcomes: no complications (uncomplicated); hospital admission, intensive care unit (ICU)**  
680 **admission, mechanical ventilation; or death from any cause in racial and ethnic minority subgroups of**  
681 **women with previous or active history of breast cancer compared to NHW adjusted for baseline**  
682 **characteristics. We also plan to evaluate the death within 30 days of COVID-19 diagnosis among racial and**  
683 **ethnic subgroups of women with previous or active history of breast cancer compared to NHW adjusted for**  
684 **baseline characteristics.**

685 We *hypothesize* that there will be higher rates of severe COVID-19 related outcomes in the racial and ethnic  
686 minority subgroups compared to non-Hispanic white (NHW) patients with active or previous history of breast  
687 cancer.

688

- 689 • **Exploratory aims:**

690

- 691 1. To evaluate the frequency of hospitalization, supplemental oxygen use, ICU admission and use of  
692 mechanical ventilation in the various racial ethnic groups.  
693 2. To describe the distribution of major clinical, sociodemographic, breast cancer risk factors and outcomes in  
694 men with active or previous history of breast cancer diagnosed with COVID-19.  
695 3. Assess the rate of major clinical complications such as cardiovascular, pulmonary, gastrointestinal,  
696 superimposed infection, vascular thrombosis and others among various racial and ethnic groups of women  
697 with active or previous history of breast cancer.  
698

699 **4. Study Design**

700 Study Design:

701 Present key elements of study design early in the paper

702 This is a retrospective cohort study using de-identified data from the COVID-19 and Cancer Consortium (CCC19) database  
703 which is a centralized multi-institution registry of patients with current or past history of cancer diagnosed with COVID-19.  
704 Study data are collected and managed using REDCap software hosted at Vanderbilt University Medical Center.

705

706

707 **5. Setting**

708 **Setting**

709 Describe the setting, locations, and relevant dates, including periods of recruitment, exposure, follow-up, and data collection.

710 The CCC19 international registry consists of de-identified data on adult patients (18 years and older) with a current or past  
711 history of hematologic malignancy or invasive solid tumor who either have laboratory-confirmed SARS-CoV-2 infection or  
712 presumptive diagnosis of COVID-19. The CCC19 registry includes patients with either active cancer or a history of cancer  
713 and contains variables related to patient demographics, cancer history, and COVID-19 clinical course including receipt of  
714 COVID-19 related therapeutics along with follow-up data. The member institutions of the consortium report data through the  
715 online REDCap data collection survey developed by CCC19. Data collection period is ongoing, for the purpose of this  
716 analysis, the data collected from March 17, 2020 to February 9 2021 will be used.

717 **6. Participants**

718 (a) Give the eligibility criteria, and the sources and methods of selection of participants. Describe methods of follow-up:

719

720 Patients with active or previous history of invasive breast cancer with evaluable self-reported race/ethnicity data, and with  
721 laboratory confirmed COVID-19 will be our study population. While the primary analysis will be restricted to women with  
722 active or previous history of breast cancer and descriptive data on men with active or previous history of breast cancer will be  
723 provided separately as part of the exploratory analysis given the small numbers. We will restrict our analysis to patients  
724 diagnosed in the United States of America since the racial and ethnic disparities of interest have been previously described in  
725 United States. We will also exclude patients who have multiple malignancies including a history of bilateral breast cancer  
726 with the exception of contralateral DCIS only. Further, patients who are not evaluable for the primary ordinal outcome or  
727 with a data quality score >4 will be excluded. For this analysis, the unknown/Not reported category of race and ethnicity will  
728 be excluded.

729

730

731

732

733

734

735

736

737

738

739

740

741

742

743  
744  
745  
746  
747  
748  
749  
750  
751  
752  
753  
754  
755  
756  
757  
758  
759  
760  
761  
762  
763  
764  
765  
766  
767  
768  
769  
770  
771  
772  
773  
774

CONSORT flow diagram

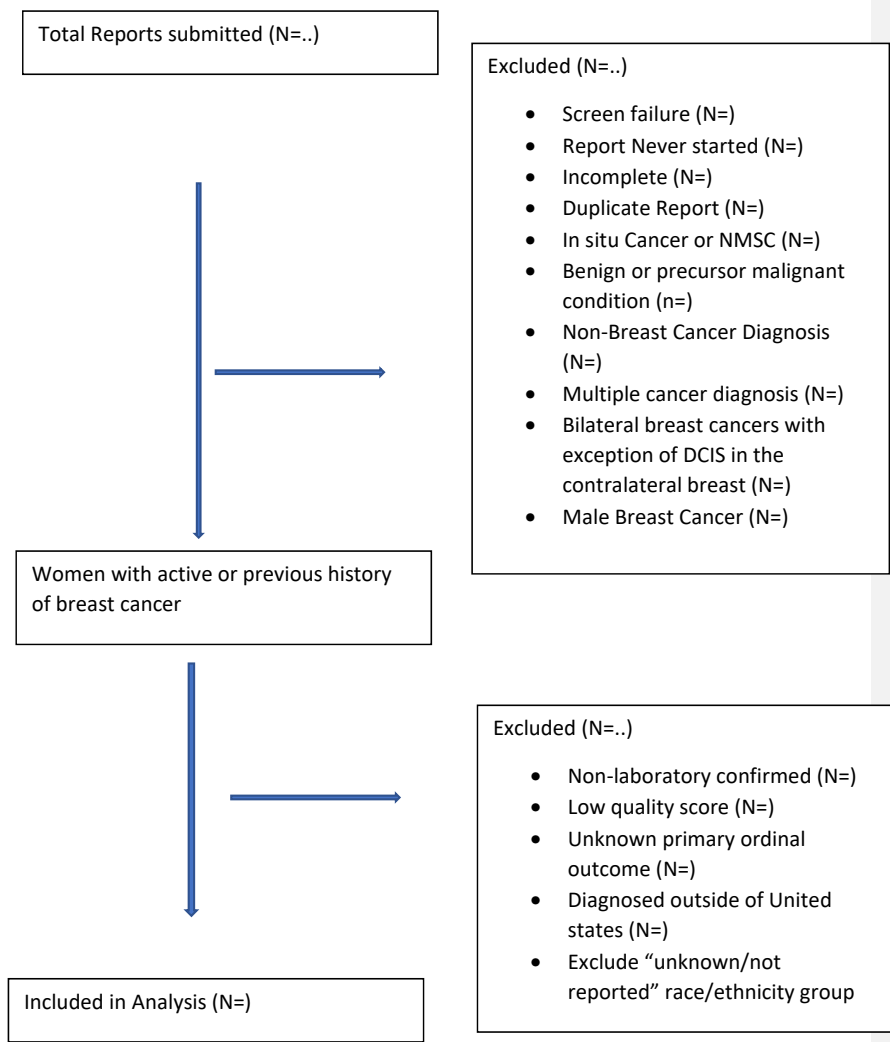

775 (b) For matched studies, give matching criteria and number of exposed and unexposed:

776

777 Not applicable as the CCC19 registry does not carry data for cancer patients who are not exposed to Covid-19.

778

779 **7. Variables (Clearly define all variables)**

780 **Outcomes:**

- 781 • Primary: COVID-19 severity outcome defined on a five-level ordinal scale based on patient's most severe reported
- 782 outcomes: No complications (uncomplicated); hospital admission; intensive care unit admission, mechanical
- 783 ventilation; or death from any cause.
- 784 • Secondary: 30-day all-cause mortality
- 785 • Exploratory/Descriptive:
- 786 ○ Rates of hospitalization; oxygen requirements; ICU admission; mechanical ventilation.
- 787 ○ Major clinical complications (cardiovascular, pulmonary, gastrointestinal, AKI, MOF, superimposed
- 788 infection, sepsis, any bleeding, DIC, Thrombosis).
- 789 ○ Descriptive statistics for men with breast cancer diagnosed with COVID-19.

790

791 **Exposures**

792

793 **Predictors**

- 793 1) Self-reported race
- 794 2) Self-reported ethnicity

795

796 **Potential confounders**

797

798 **Higher priority**

- 797 1) Age in years
- 798 2) Obesity (obese, not obese)
- 799 3) Co-morbidities (pulmonary, cardiovascular, renal, diabetes mellitus)
- 800 4) ECOG PS (0, 1,  $\geq 2$ , unknown)
- 801 5) Receptor status (Hormone receptor positive, HER2 positive, dual positive, Triple negative)
- 802 6) Cancer status (remission < 5 years, remission > 5 years, active stable, active responding, active progressing,
- 803 unknown)
- 804 7) Timing of anti-cancer treatment (never treated, 0-4 weeks, 1-3 months, >3 months)
- 805 8) Modality of recent anti-cancer treatment (none, cytotoxic chemotherapy, targeted therapy, endocrine therapy,
- 806 immunotherapy, locoregional therapy, other)
- 807 9) Period of COVID-19 diagnosis (Jan-April 2020, May-August 2020, Sep-Nov 2020, Dec 2020-Feb 2021)

808

809 **Lower priority**

- 810 10) Smoking (ever, never)
- 811 11) US region of patient residence (NE, MW, South, West)
- 812 12) Area of patient residence (urban, suburban, rural)
- 813 13) Insurance status (Not insured, private insurance, Medicaid/Medicare, other government, missing/unknown)
- 814 14) Treatment center characteristics academic (university, tertiary and NCI designated comprehensive cancer centers),
- 815 community (practice and hospital), other.

816

817 **Effect modifiers**

818 **None**

819

820 Diagnostic criteria (if applicable)

#### 821 8. Data Sources / Measurement

822 For each variable of interest, give sources of data and details of methods of assessment (measurement). Describe  
823 comparability of assessment methods if there is more than one group.

824

#### 825 9. Bias

826 Describe any efforts to address potential sources of bias

827 Multivariable regression models will be used to adjust for known confounding variables.

828

#### 829 10. Study size

830 Explain how the study size was arrived at

831 Study size is based on the number of breast cancer cases reported in the registry at the time of Analysis. Breast cancer is the  
832 single largest solid tumor cohort within the CCC19 registry accounting for roughly 21% of cases. The numbers are expected  
833 to rise given the steep accrual rate.

834

#### 835 11. Quantitative variables

836 Explain how quantitative variables will be handled in the analyses. If applicable, describe which groupings will be chosen  
837 and why

838

#### 839 12. Statistical methods

840 (a) Describe all statistical methods, including those to be used to control for confounding

841

842 *Primary analysis among women:*

843 Standard descriptive statistics will summarize major clinical, demographic, and breast cancer prognostic factors; clinical  
844 complications during hospitalization; and rates of 30-day mortality, hospitalization, oxygen requirement, ICU admission, and  
845 mechanical ventilation among racial and ethnic subgroups. Multivariable ordinal and binary logistic regression models will  
846 estimate differences in adjusted odds of COVID-19 severity and 30-day mortality, respectively, between racial and ethnic  
847 subgroups. Because the ordinal outcome is assessed over patient's total follow-up period, the model will include an offset for  
848 (log) follow-up time. Adjustment covariates will be selected first from the "higher priority" confounders listed above,  
849 followed by those listed as "lower priority." Coefficients and standard errors from models with different levels of adjustment,  
850 variance inflation factors, and clinical judgement will be used to assess model stability.

851

852 *Descriptive analysis among men:*

853 We will calculate standard descriptive statistics for major clinical, demographic, and breast cancer prognostic factors and  
854 clinical complications during hospitalization; rates of 30-day mortality, hospitalization, oxygen requirement, ICU admission,  
855 and mechanical ventilation among men with active or previous history of breast cancer.

856



857  
858 (b) Describe any methods that will be used to examine subgroups and interactions

859 None included.

860

861 (c) Explain how missing data will be addressed

862 Multiple imputation will be used to impute missing and unknown data for all variables included in the analysis, with some  
863 exceptions: unknown ECOG performance score and unknown cancer status will not be imputed and treated as a separate  
864 category in analyses. Imputation will be performed on the largest dataset possible (that is, after removing test cases and other  
865 manual exclusions, but before applying specific exclusion criteria). At least 10 imputed datasets will be used.

866

867 (d) If applicable, explain how loss to follow-up will be addressed

868 All observed outcomes will be used with models adjusted for duration of follow-up.

869

870 (e) Describe any sensitivity analyses

871 None.

872

873

874

875

876

877

878

879

880

881

882

883

884

885

886

887

888

889

890

891

892

893

894 **APPENDIX C: CCC19 Approved Project Variables**

895 *Primary Outcome (Table III)*

| Outcome description                                   | Outcome variable name  | Outcome values                                                                                     |
|-------------------------------------------------------|------------------------|----------------------------------------------------------------------------------------------------|
| Custom ordinal outcome with death at any time         | <i>der_ordinal_v1a</i> | 0 = not hospitalized; 1 = hospitalized; 2 = ICU; 3 = mechanical ventilation; 4 = death at any time |
| Follow-up in days, with some estimation for intervals | <i>der_days_fu</i>     | Integer (days)                                                                                     |

896

897 *Secondary Outcome (Table II)*

| Outcome description                                                                                      | Outcome variable name                                                           | Outcome values                | Additional Details                                                                                                                                                                                                                                                                                                                                                                                                                                                                                                                                                                                                                                                   |
|----------------------------------------------------------------------------------------------------------|---------------------------------------------------------------------------------|-------------------------------|----------------------------------------------------------------------------------------------------------------------------------------------------------------------------------------------------------------------------------------------------------------------------------------------------------------------------------------------------------------------------------------------------------------------------------------------------------------------------------------------------------------------------------------------------------------------------------------------------------------------------------------------------------------------|
| Derived dead/alive variable                                                                              | <i>der_deadbinary</i>                                                           | 0 = No; 1 = Yes; 99 = Unknown |                                                                                                                                                                                                                                                                                                                                                                                                                                                                                                                                                                                                                                                                      |
| Derived variable indicating whether patient has died within 30 days of COVID-19 diagnosis (default = No) | <i>der_dead30</i>                                                               | 0 = No; 1 = Yes; 99 = Unknown |                                                                                                                                                                                                                                                                                                                                                                                                                                                                                                                                                                                                                                                                      |
| Derived variable indicating whether patients required mechanical ventilation                             | <i>der_mv</i>                                                                   | 0 = No; 1 = Yes; 99 = Unknown |                                                                                                                                                                                                                                                                                                                                                                                                                                                                                                                                                                                                                                                                      |
| Derived variable indicating time in ICU                                                                  | <i>der_ICU</i>                                                                  | 0 = No; 1 = Yes; 99 = Unknown |                                                                                                                                                                                                                                                                                                                                                                                                                                                                                                                                                                                                                                                                      |
| Derived hospitalized/not hospitalized variable                                                           | <i>der_hosp</i>                                                                 | 0 = No; 1 = Yes; 99 = Unknown |                                                                                                                                                                                                                                                                                                                                                                                                                                                                                                                                                                                                                                                                      |
| Derived cardiovascular complication variable (see additional details)                                    | <i>der_CV_event_v2</i><br>( <i>der_any_CV</i> is the variable name in R script) | 0 = No; 1 = Yes; 99=Unknown.  | <p>Derived with the following derived variables:</p> <ul style="list-style-type: none"> <li><i>der_hotn_comp</i>,</li> <li><i>der_MI_comp</i>,</li> <li><i>der_card_isch_comp</i>,</li> <li><i>der_AFib_comp</i>,</li> <li><i>der_VF_comp</i>,</li> <li><i>der_arry_oth_comp</i>,</li> <li><i>der_CMY_comp</i>,</li> <li><i>der_CHF_comp</i>,</li> <li><i>der_PE_comp</i>,</li> <li><i>der_DVT_comp</i>,</li> <li><i>der_stroke_comp</i>,</li> <li><i>der_thrombosis_NOS_comp</i></li> </ul> <p>Coded as 1 if any of these variables is 1; coded as 0 if all these variables are 0; coded as 99 if any of variables is 99 and <i>der_CV_event_v2</i> is missing;</p> |

|                                                                                |                                                                   |                               |                                                                                                                                                                                                                                                                                                                                                                                                                                                          |
|--------------------------------------------------------------------------------|-------------------------------------------------------------------|-------------------------------|----------------------------------------------------------------------------------------------------------------------------------------------------------------------------------------------------------------------------------------------------------------------------------------------------------------------------------------------------------------------------------------------------------------------------------------------------------|
|                                                                                |                                                                   |                               | otherwise, NA<br><br>For all listed variable here:<br>0=No, 1=Yes, 99=Unknown                                                                                                                                                                                                                                                                                                                                                                            |
| <b>Derived pulmonary complication variable (see additional details)</b>        | der_pulm_event<br>(der_any_Pulm is the variable name in R script) | 0 = No; 1 = Yes; 99=Unknown.  | Derived with the following derived variables:<br><br>der_resp_failure_comp,<br>der_pneumonitis_comp,<br>der_pneumonia_comp,<br>der_ARDS_comp,<br>der_PE_comp,<br>der_pleural_eff_comp,<br>der_empyema_comp<br><br>Coded as 1 if any of these variables is 1; coded as 0 if all these variables are 0; coded as 99 if any of variables is 99 and der_pulm_event is missing; otherwise, NA<br><br>For all listed variable here:<br>0=No, 1=Yes, 99=Unknown |
| <b>Derived gastrointestinal complication variable (see additional details)</b> | der_GI_event<br>(der_any_Gast is the variable name in R script)   | 0 = No; 1 = Yes; 99=Unknown.  | Derived with the following derived variables:<br><br>der_AHI_comp,<br>der_ascites_comp,<br>der_BO_comp,<br>der_bowelPerf_comp,<br>der_ileus_comp,<br>der_peritonitis_comp<br><br>Coded as 1 if any of these variables is 1; coded as 0 if all these variables are 0; coded as 99 if any of variables is 99 and der_GI_event is missing; otherwise, NA<br><br>For all listed variable here:<br>0=No, 1=Yes, 99=Unknown                                    |
| <b>Acute kidney injury (checkbox only)</b>                                     | der_AKI_comp                                                      | 0 = No; 1 = Yes; 99 = Unknown |                                                                                                                                                                                                                                                                                                                                                                                                                                                          |
| <b>Multisystem organ failure</b>                                               | der_MOF_comp                                                      | 0 = No; 1 = Yes; 99 = Unknown |                                                                                                                                                                                                                                                                                                                                                                                                                                                          |
| <b>Any co-infection within +/- 2 weeks of COVID-19 dx</b>                      | der_coinfection_any                                               | 0 = No; 1 = Yes; 99 = Unknown |                                                                                                                                                                                                                                                                                                                                                                                                                                                          |
| <b>Sepsis</b>                                                                  | der_sepsis_comp                                                   | 0 = No; 1 = Yes; 99 = Unknown |                                                                                                                                                                                                                                                                                                                                                                                                                                                          |
| <b>Bleeding</b>                                                                | der_bleeding_comp                                                 | 0 = No; 1 = Yes; 99 = Unknown |                                                                                                                                                                                                                                                                                                                                                                                                                                                          |
| <b>DIC (without modifier of</b>                                                | der_DIC_comp                                                      | 0 = No; 1 = Yes; 99 =         |                                                                                                                                                                                                                                                                                                                                                                                                                                                          |

|                                                          |                     |                               |  |
|----------------------------------------------------------|---------------------|-------------------------------|--|
| definite/probable/possible)                              |                     | Unknown                       |  |
| Remdesivir as treatment for COVID-19 ever                | der_rem             | 0 = No; 1 = Yes; 99 = Unknown |  |
| Hydroxychloroquine as COVID-19 treatment ever            | der_hcq             | 0 = No; 1 = Yes; 99 = Unknown |  |
| Steroids as COVID-19 treatment ever                      | der_steroids_c19    | 0 = No; 1 = Yes; 99 = Unknown |  |
| COVID-19 treatments other than HCQ, steroids, remdesivir | der_other_tx_c19_v2 | 0 = No; 1 = Yes; 99 = Unknown |  |
| Indicates whether patient has ever had supplemental o2   | der_o2_ever         | 0 = No; 1 = Yes; 99 = Unknown |  |

898  
899  
900

| Covariate description                                                                      | Variable name | Covariate values                                                                                                               | Additional Details |
|--------------------------------------------------------------------------------------------|---------------|--------------------------------------------------------------------------------------------------------------------------------|--------------------|
| Race/ethnicity including Asian                                                             | der_race_v2   | Hispanic; Non-Hispanic AAPI; Non-Hispanic Black; Non-Hispanic White; Other                                                     |                    |
| Age with imputation for categoricals                                                       | der_age_trunc | Years (continuous 18-89; patients noted to be greater than 89 are set to be age = 90)                                          |                    |
| Insurance type                                                                             | der_insurance | Medicaid alone; Medicare alone; Medicare/Medicaid +/- other; Other government +/- other; Private +/- other; Uninsured; Unknown |                    |
| Derived variable for smoking status collapsing the current/former smoker variables         | der_smoking2  | Never; Current or Former; Unknown                                                                                              |                    |
| Binary obesity (BMI $\geq$ 30 or checkbox checked) indicator                               | der_obesity   | 0 = No; 1 = Yes; 99 = Unknown                                                                                                  |                    |
| Cardiovascular comorbidity (CAD, CHF, Afib, arrhythmia NOS, PVD, CVA, cardiac disease NOS) | der_card      | 0 = No; 1 = Yes; 99 = Unknown                                                                                                  |                    |
| Derived variable indicating whether patient has pulmonary comorbidities                    | der_pulm      | 0 = No; 1 = Yes; 99 = Unknown                                                                                                  |                    |
| Renal comorbidities                                                                        | der_renal     | 0 = No; 1 = Yes; 99 =                                                                                                          |                    |

|                                                                                             |                         |                                                                                                                                         |                                                                                                                                                                                                                                                                                                               |
|---------------------------------------------------------------------------------------------|-------------------------|-----------------------------------------------------------------------------------------------------------------------------------------|---------------------------------------------------------------------------------------------------------------------------------------------------------------------------------------------------------------------------------------------------------------------------------------------------------------|
|                                                                                             |                         | Unknown                                                                                                                                 |                                                                                                                                                                                                                                                                                                               |
| <b>Derived variable indicating whether patient has diabetes mellitus</b>                    | der_dm2                 | 0 = No; 1 = Yes; 99 = Unknown                                                                                                           |                                                                                                                                                                                                                                                                                                               |
| <b>Performance Status</b>                                                                   | der_ecogcat2            | ECOG 0, 1, or 2+                                                                                                                        |                                                                                                                                                                                                                                                                                                               |
| <b>Breast biomarkers combined variable</b>                                                  | der_breast_biomarkers   | 1 = ER+; 2 = ER+/HER2+; 3 = HER2+; 4 = triple negative; 99 = Unknown                                                                    |                                                                                                                                                                                                                                                                                                               |
| <b>Derived variable indicating cancer status (Splits remission/NED by cancer timing)</b>    | der_cancer_status_v4    | 0 - Remission/NED, remote; 1 - Remission/NED, recent; 2 - Active, responding; 3 - Active, stable; 4 - Active, progressing; 99 - Unknown |                                                                                                                                                                                                                                                                                                               |
| <b>Timing of cancer treatment relative to COVID-19, collapsed</b>                           | der_cancer_tx_timing_v2 | 0 = more than 3 months; 1 = 0-4 weeks; 2 = 1-3 months (*); 88 = never or after COVID-19 diagnosis; 99 = unknown                         |                                                                                                                                                                                                                                                                                                               |
| <b>No cancer treatment in the 3 months prior to COVID-19</b>                                | der_cancertr_none       | 0=No; 1=Yes; 99=Unknown                                                                                                                 | Derived with the following covariates:<br><br>der_any_cyto,<br>der_any_targeted,<br>der_any_endo,<br>der_any_immuno,<br>der_any_local,<br>der_any_other<br><br>Coded as 1 if all these variables are 0; coded as 0 if any of these variables is 1; coded as 99 if any of these variables is 99; otherwise, NA |
| <b>Any cytotoxic cancer treatment in the 3 months prior to COVID-19</b>                     | der_any_cyto            | 0 = No; 1 = Yes; 99 = Unknown                                                                                                           |                                                                                                                                                                                                                                                                                                               |
| <b>Any targeted therapy in the 3 months prior to COVID-19</b>                               | der_any_targeted        | 0 = No; 1 = Yes; 99 = Unknown                                                                                                           |                                                                                                                                                                                                                                                                                                               |
| <b>Any targeted therapy includes an anti-HER2 therapy in the 3 months prior to COVID-19</b> | der_her2_3m             | 0 = No; 1 = Yes                                                                                                                         | Derived with der_her2, der_any_targeted.<br><br>Coded as 1 if der_any_targeted is 1 and der_her2 is 1<br><br>Coded as 0 if:<br>a. der_any_targeted is 1 and der_her2 is 0<br>b. der_any_targeted is 1<br><br>Otherwise, NA                                                                                    |

|                                                                                                               |                |                                                                             |                                                                                                                                                                                                                                                                                                                                                          |
|---------------------------------------------------------------------------------------------------------------|----------------|-----------------------------------------------------------------------------|----------------------------------------------------------------------------------------------------------------------------------------------------------------------------------------------------------------------------------------------------------------------------------------------------------------------------------------------------------|
|                                                                                                               |                |                                                                             | <p>der_her2:<br/>0 = No; 1 = Yes</p>                                                                                                                                                                                                                                                                                                                     |
| <p><b>Any targeted therapy includes a CDK4/6 inhibitor therapy in the 3 months prior to COVID-19</b></p>      | der_cdk46i_3m  | 0 = No; 1 = Yes                                                             | <p>Derived with der_cdk46i, der_any_targeted.</p> <p>Coded as 1 if der_any_targeted is 1 and der_cdk46i is 1</p> <p>Coded as 0 if:<br/>a. der_any_targeted is 1 and der_cdk46i is 0<br/>b. der_any_targeted is 1</p> <p>Otherwise, NA</p> <p>der_cdk46i:<br/>0 = No; 1 = Yes</p>                                                                         |
| <p><b>Any other targeted therapy (Not anti-HER2 / CDK4/6 inhibitor) in the 3 months prior to COVID-19</b></p> | der_other_3m   | 0 = No; 1 = Yes                                                             | <p>Derived with der_targeted_not_her2_cdk46i, der_any_targeted.</p> <p>Coded as 1 if der_any_targeted is 1 and der_targeted_not_her2_cdk46i is 1</p> <p>Coded as 0 if:<br/>a. der_any_targeted is 1 and der_targeted_not_her2_cdk46i is 0<br/>b. der_any_targeted is 1</p> <p>Otherwise, NA</p> <p>der_targeted_not_her2_cdk46i:<br/>0 = No; 1 = Yes</p> |
| <p><b>Any endocrine therapy in the 3 months prior to COVID-19</b></p>                                         | der_any_endo   | 0 = No; 1 = Yes; 99 = Unknown                                               |                                                                                                                                                                                                                                                                                                                                                          |
| <p><b>Any immunotherapy in the 3 months prior to COVID-19</b></p>                                             | der_any_immuno | 0 = No; 1 = Yes; 99 = Unknown                                               |                                                                                                                                                                                                                                                                                                                                                          |
| <p><b>Any local therapy (surgery or RT) within 3 months</b></p>                                               | der_any_local  | 0 = No; 1 = Yes; 99 = Unknown                                               |                                                                                                                                                                                                                                                                                                                                                          |
| <p><b>Any other cancer therapy in the 3 months prior to COVID-19</b></p>                                      | der_any_other  | 0 = No; 1 = Yes; 99 = Unknown                                               |                                                                                                                                                                                                                                                                                                                                                          |
| <p><b>Region of patient residence with ex-US collapsed</b></p>                                                | der_region_v2  | Non-US; Other; Undesignated US; US Midwest; US Northeast; US South; US West |                                                                                                                                                                                                                                                                                                                                                          |
| <p><b>Trimester and year of</b></p>                                                                           | der_tri_rt_dx  | T1 2020; T2 2020; T3                                                        |                                                                                                                                                                                                                                                                                                                                                          |

|                                                                                            |                                      |                                                                                                                                     |                                                                                                                                                                                                                                                                                                                                                                                                                                                                            |
|--------------------------------------------------------------------------------------------|--------------------------------------|-------------------------------------------------------------------------------------------------------------------------------------|----------------------------------------------------------------------------------------------------------------------------------------------------------------------------------------------------------------------------------------------------------------------------------------------------------------------------------------------------------------------------------------------------------------------------------------------------------------------------|
| <b>diagnosis, using the most recent side of the interval as anchor</b>                     |                                      | 2020; T1 2021                                                                                                                       |                                                                                                                                                                                                                                                                                                                                                                                                                                                                            |
| <b>What type of area does the patient primarily reside in?</b>                             | urban_rural <sup>1</sup>             | 1, Urban (city)   2, Suburban (town, suburbs)   3, Rural (country)   88, Other   99, Unknown                                        |                                                                                                                                                                                                                                                                                                                                                                                                                                                                            |
| <b>The type of health care center providing the patient's data</b>                         | der_site_type                        | AMC = academic medical center; CP = community practice; TCC = tertiary care center                                                  |                                                                                                                                                                                                                                                                                                                                                                                                                                                                            |
| <b>Initial Severity and Course of Illness</b>                                              | severity_of_covid_19_v2 <sup>1</sup> | 1, Mild (no hospitalization required)   2, Moderate (hospitalization indicated)   3, Severe (ICU admission indicated)   99, Unknown |                                                                                                                                                                                                                                                                                                                                                                                                                                                                            |
| <b>Derived treatment intent</b>                                                            | der_tr_intent                        | Unknown Treatment; Not on Treatment; Palliative; Curative; Missing<br><br>Unknown Treatment and Missing were collapsed for analysis | Derived with der_anytx and treatment_intent:<br><br>Coded as "Unknown Treatment" if der_anytx is NA or 99;<br><br>Coded as "Not on Treatment" if der_anytx is 0<br><br>Coded as "Palliative" if der_anytx is 1 and treatment_intent is 2<br><br>Coded as "Curative" if der_anytx is 1 and treatment_intent is 1<br><br>Otherwise, Missing<br><br>der_anytx:<br>0 = No; 1 = Yes; 99 = Unknown<br><br>Treatment_intent: 1, Curative   2, Palliative   99, Unclear or unknown |
| <b>Most recent line of cancer treatment, including systemic and non-systemic therapies</b> | der_txline                           | Untreated in last 12 months; Curative NOS; First line; Non-curative NOS; Other; Second line or greater; Unknown                     |                                                                                                                                                                                                                                                                                                                                                                                                                                                                            |
| <b>Hematologic malignancy indicator</b>                                                    | der_heme                             | 0 = No; 1 = Yes                                                                                                                     |                                                                                                                                                                                                                                                                                                                                                                                                                                                                            |

901

| Other covariate related to cohort selection for analysis | Variable name | Covariate values | Covariate description |
|----------------------------------------------------------|---------------|------------------|-----------------------|
| <b>Sex (Recode other/prefer not to</b>                   | der_sex       | Male, Female     |                       |

|                                                                                                                                                                                                                        |                            |                                    |  |
|------------------------------------------------------------------------------------------------------------------------------------------------------------------------------------------------------------------------|----------------------------|------------------------------------|--|
| say gender --> missing)                                                                                                                                                                                                |                            |                                    |  |
| Breast cancer                                                                                                                                                                                                          | der_Breast                 | 0 = No; 1 = Yes                    |  |
| Cancer type of second malignancy.<br><br>If the patient has more than two malignancies, please select the second-most recently diagnosed cancer type. If unknown or unclear, please specify in the free text box below | cancer_type_2 <sup>1</sup> | ** indicates no second malignancy. |  |
| Region of patient residence with US and ex-US collapsed                                                                                                                                                                | der_region_v3              | Non-US; Other; US                  |  |

902

903 New covariate request – 2-5-22

| New covariate          | Variable name   | Covariate values              | Covariate description                                               |
|------------------------|-----------------|-------------------------------|---------------------------------------------------------------------|
| MBC vs non-MBC         | der_metastatic  | 0 = No; 1 = Yes; 99 = Unknown | Metastatic cancer status (only applicable to solid tumors/lymphoma) |
| MBC site of metastasis | der_met_bone    | 0 = No; 1 = Yes; 99 = Unknown | Metastatic to bone                                                  |
| MBC site of metastasis | der_met_liver   | 0 = No; 1 = Yes; 99 = Unknown | Metastatic to liver                                                 |
| MBC site of metastasis | der_met_lung_v2 | 0 = No; 1 = Yes; 99 = Unknown | Metastatic to lung                                                  |

904

905



906 **APPENDIX D: Supplementary Figure I - Proportional Odds Assumption**

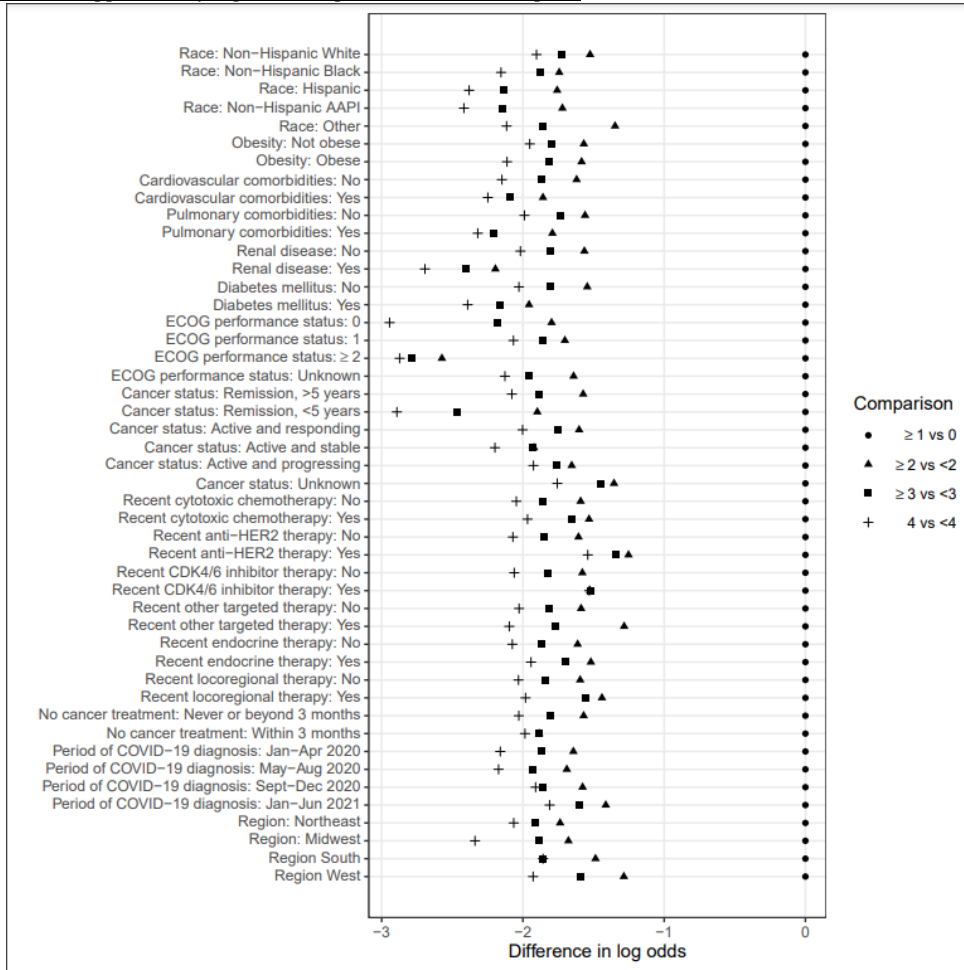

907  
908  
909  
910  
911  
912  
913  
914

915 **APPENDIX E**

| <b>Supplement Table 1. Unadjusted rates of outcomes after COVID-19 diagnosis by cancer status</b> |                           |                           |                                      |                                  |                                       |                             |                          |
|---------------------------------------------------------------------------------------------------|---------------------------|---------------------------|--------------------------------------|----------------------------------|---------------------------------------|-----------------------------|--------------------------|
|                                                                                                   | <b>NED&gt;5<br/>Years</b> | <b>NED&lt;5<br/>Years</b> | <b>Active<br/>and<br/>Responding</b> | <b>Active<br/>and<br/>Stable</b> | <b>Active<br/>and<br/>Progressing</b> | <b>Missing/<br/>Unknown</b> | <b>Total</b>             |
|                                                                                                   | <b>n<sup>a</sup> (%)</b>  | <b>n<sup>a</sup> (%)</b>  | <b>n<sup>a</sup> (%)</b>             | <b>n<sup>a</sup> (%)</b>         | <b>n<sup>a</sup> (%)</b>              | <b>n<sup>a</sup> (%)</b>    | <b>n<sup>a</sup> (%)</b> |
| <b>Outcomes</b>                                                                                   |                           |                           |                                      |                                  |                                       |                             |                          |
| Total all-cause mortality <sup>b</sup>                                                            | 40 (11)                   | 12 (3)                    | 12 (7)                               | 11 (7)                           | 37 (38)                               | 11 (9)                      | 123 (9)                  |
| 30-day all-cause mortality <sup>c</sup>                                                           | 29 (8)                    | 10 (2)                    | 10 (6)                               | 4 (2)                            | 27 (28)                               | 9 (7)                       | 89 (6)                   |
| Received mechanical ventilation <sup>b</sup>                                                      | 20 (5)                    | 13 (3)                    | 9 (5)                                | 7 (4)                            | 12 (12)                               | 8 (7)                       | 69 (5)                   |
| Admitted to an intensive care unit <sup>b</sup>                                                   | 35 (10)                   | 25 (6)                    | 13 (8)                               | 8 (5)                            | 18 (19)                               | 12 (10)                     | 111 (8)                  |
| Admitted to the hospital <sup>b</sup>                                                             | 163 (43)                  | 129 (29)                  | 54 (31)                              | 57 (34)                          | 70 (72)                               | 39 (32)                     | 512 (37)                 |
| <sup>a</sup> N is based on non-missing data                                                       |                           |                           |                                      |                                  |                                       |                             |                          |
| <sup>b</sup> Included in primary ordinal COVID-19 severity outcome.                               |                           |                           |                                      |                                  |                                       |                             |                          |
| <sup>c</sup> Secondary outcome.                                                                   |                           |                           |                                      |                                  |                                       |                             |                          |

916  
917  
918  
919  
920  
921  
922  
923  
924  
925  
926  
927  
928  
929  
930  
931  
932  
933  
934  
935

936 **APPENDIX F**

937

| <b>Supplementary Table IIA: Baseline characteristics of female patients with MBC</b> |                   |
|--------------------------------------------------------------------------------------|-------------------|
| <b>MBC<br/>(N=233)</b>                                                               |                   |
| <b>Age, years<sup>a</sup></b>                                                        |                   |
| Median [IQR]                                                                         | 58.0 [49.8, 68.3] |
| <b>Race/Ethnicity</b>                                                                |                   |
| Non-Hispanic White                                                                   | 107 (46%)         |
| Non-Hispanic Black                                                                   | 56 (24%)          |
| Hispanic                                                                             | 50 (21%)          |
| Non-Hispanic AAPI                                                                    | 10 (4%)           |
| Other                                                                                | 10 (4%)           |
| <b>Smoking Status</b>                                                                |                   |
| Never                                                                                | 162 (70%)         |
| Current or Former                                                                    | 66 (28%)          |
| Missing/unknown                                                                      | 5 (2%)            |
| <b>Obesity</b>                                                                       |                   |
| No                                                                                   | 139 (60%)         |
| Yes                                                                                  | 93 (40%)          |
| <b>Comorbidities<sup>b</sup></b>                                                     |                   |
| Cardiovascular                                                                       | 42 (18%)          |
| Pulmonary                                                                            | 37 (16%)          |
| Renal Disease                                                                        | 16 (7%)           |
| Diabetes mellitus                                                                    | 52 (22%)          |
| Missing/unknown                                                                      | 3 (1%)            |
| <b>ECOG Performance Status</b>                                                       |                   |
| 0                                                                                    | 63 (27%)          |
| 1                                                                                    | 84 (36%)          |
| 2+                                                                                   | 42 (18%)          |
| Unknown                                                                              | 44 (19%)          |
| Missing                                                                              | 0 (0%)            |
| <b>Receptor status</b>                                                               |                   |
| HR+/HER2-                                                                            | 98 (42%)          |
| HR+/HER2+                                                                            | 53 (23%)          |
| HR-/HER2+                                                                            | 26 (11%)          |
| Triple Negative                                                                      | 33 (14%)          |
| Missing/unknown                                                                      | 23 (10%)          |
| <b>Cancer Status</b>                                                                 |                   |

|                                                             |           |
|-------------------------------------------------------------|-----------|
| Active and responding                                       | 55 (24%)  |
| Active and stable                                           | 78 (33%)  |
| Active and progressing                                      | 74 (32%)  |
| Unknown                                                     | 25 (11%)  |
| Missing                                                     | 0 (0%)    |
| <b>Metastatic sites (MBC)</b>                               |           |
| Lung                                                        | 65 (28%)  |
| Bone                                                        | 135 (58%) |
| Liver                                                       | 61 (26%)  |
| Missing/unknown                                             | 19 (8%)   |
| <b>Timing of anti-cancer therapy</b>                        |           |
| Never/After COVID-19                                        | X*        |
| 0-4 weeks                                                   | 189 (81%) |
| 1-3 months                                                  | 14 (6%)   |
| >3 months                                                   | 19 (8%)   |
| Missing/unknown                                             | 11 (5%)*  |
| <b>Modality of active anti-cancer therapy<sup>b,c</sup></b> |           |
| None                                                        | 24 (10%)  |
| Cytotoxic Chemotherapy                                      | 114 (49%) |
| Targeted Therapy                                            | 115 (49%) |
| Endocrine Therapy                                           | 98 (42%)  |
| Immunotherapy                                               | 17 (7%)   |
| Local (Surgery/Radiation)                                   | 27 (12%)  |
| Other                                                       | 6 (3%)    |
| Missing/unknown                                             | 6 (3%)    |
| <b>Region</b>                                               |           |
| Northeast                                                   | 97 (42%)  |
| Midwest                                                     | 44 (19%)  |
| South                                                       | 34 (15%)  |
| West                                                        | 56 (24%)  |
| Undesignated                                                | 2 (1%)    |
| <b>Period of COVID-19 diagnosis</b>                         |           |
| Jan-Apr 2020                                                | 33 (14%)  |
| May-Aug 2020                                                | 101 (43%) |
| Sept-Dec 2020                                               | 52 (22%)  |
| Jan-Aug 2021                                                | 45 (19%)  |
| Missing/unknown                                             | 2 (1%)    |
| <b>Area of patient residence</b>                            |           |
| Urban                                                       | 103 (44%) |
| Suburban                                                    | 80 (34%)  |
| Rural                                                       | 12 (5%)   |
| Missing/unknown                                             | 38 (16%)  |
| <b>Treatment center characteristics</b>                     |           |

|                                                                                            |           |
|--------------------------------------------------------------------------------------------|-----------|
| Academic Medical Center                                                                    | 43 (18%)  |
| Community Practice                                                                         | 63 (27%)  |
| Tertiary Care Center                                                                       | 127 (55%) |
| Missing/unknown                                                                            | 0 (0%)    |
| <b>Severity of COVID19</b>                                                                 |           |
| Mild                                                                                       | 126 (54%) |
| Moderate                                                                                   | 93 (40%)  |
| Severe                                                                                     | 13 (6%)   |
| Missing/Unknown                                                                            | 1 (<1%)   |
| <b>*Cells combined to mask N&lt;5 according to CCC19 low count policy</b>                  |           |
| <sup>a</sup> Age was truncated at 90 years.                                                |           |
| <sup>b</sup> Percentages could sum to >100% because categories are not mutually exclusive. |           |
| <sup>c</sup> Within 3 months of COVID-19 diagnosis.                                        |           |

938

**Supplement Table IIB: Unadjusted rates of outcomes after COVID-19 diagnosis in females with MBC**

|                                                                                                                                                                                                                                                                                                                            | n <sup>f</sup> (%) |
|----------------------------------------------------------------------------------------------------------------------------------------------------------------------------------------------------------------------------------------------------------------------------------------------------------------------------|--------------------|
| <b>Outcomes</b>                                                                                                                                                                                                                                                                                                            |                    |
| Total all-cause mortality <sup>a</sup>                                                                                                                                                                                                                                                                                     | 45 (19)            |
| 30-day all-cause mortality <sup>b</sup>                                                                                                                                                                                                                                                                                    | 28 (12)            |
| Received mechanical ventilation <sup>a</sup>                                                                                                                                                                                                                                                                               | 20 (9)             |
| Admitted to an intensive care unit <sup>a</sup>                                                                                                                                                                                                                                                                            | 29 (12)            |
| Admitted to the hospital <sup>a</sup>                                                                                                                                                                                                                                                                                      | 124 (53)           |
| <b>Clinical Complications</b>                                                                                                                                                                                                                                                                                              |                    |
| Any cardiovascular complication <sup>c</sup>                                                                                                                                                                                                                                                                               | 48 (21)            |
| Any pulmonary complication <sup>d</sup>                                                                                                                                                                                                                                                                                    | 86 (37)            |
| Any gastrointestinal complication <sup>e</sup>                                                                                                                                                                                                                                                                             | 13 (6)             |
| Acute kidney injury                                                                                                                                                                                                                                                                                                        | 32 (14)            |
| Multisystem organ failure                                                                                                                                                                                                                                                                                                  | 12 (5)             |
| Superimposed infection                                                                                                                                                                                                                                                                                                     | 32 (14)            |
| Sepsis                                                                                                                                                                                                                                                                                                                     | 28 (12)            |
| Any bleeding                                                                                                                                                                                                                                                                                                               | 8 (3)              |
| <b>Interventions</b>                                                                                                                                                                                                                                                                                                       |                    |
| Remdesivir                                                                                                                                                                                                                                                                                                                 | 35 (15)            |
| Hydroxychloroquine                                                                                                                                                                                                                                                                                                         | 25 (11)            |
| Corticosteroids                                                                                                                                                                                                                                                                                                            | 65 (29)            |
| Covid Other                                                                                                                                                                                                                                                                                                                | 45 (20)            |
| Supplemental oxygen                                                                                                                                                                                                                                                                                                        | 84 (37)            |
| <sup>a</sup> Included in primary ordinal COVID-19 severity outcome                                                                                                                                                                                                                                                         |                    |
| <sup>b</sup> Secondary outcome                                                                                                                                                                                                                                                                                             |                    |
| <sup>c</sup> Cardiovascular complication includes hypotension, myocardial infarction, other cardiac ischemia, atrial fibrillation, ventricular fibrillation, other cardiac arrhythmia, cardiomyopathy, congestive heart failure, pulmonary embolism (PE), deep vein thrombosis (DVT), stroke, thrombosis NOS complication. |                    |
| <sup>d</sup> Pulmonary complication includes respiratory failure, pneumonitis, pneumonia, acute respiratory distress syndrome (ARDS), PE, pleural effusion, empyema.                                                                                                                                                       |                    |
| <sup>e</sup> Gastrointestinal complication includes acute hepatic injury, ascites, bowel obstruction, bowel perforation, ileus, peritonitis                                                                                                                                                                                |                    |
| <sup>f</sup> N is based on non-missing data                                                                                                                                                                                                                                                                                |                    |

939  
940  
941  
942  
943  
944  
945  
946

**APPENDIX G**

| <b>Supplement Table III: Adjusted Associations of Race Factors with COVID-19 Severity Outcome.</b> |                   |                                      |                                   |
|----------------------------------------------------------------------------------------------------|-------------------|--------------------------------------|-----------------------------------|
| <b>Race (Ref: NHW)</b>                                                                             | COVID-19 severity |                                      |                                   |
|                                                                                                    | OR (95% CI)       | Point Value E estimates <sup>a</sup> | Lower bound E values <sup>a</sup> |
| Black                                                                                              | 1.74 (1.24- 2.45) | 1.97                                 | 1.47                              |
| Hispanic                                                                                           | 1.38 (0.93- 2.05) | 1.63                                 | 1.00                              |
| AAPI                                                                                               | 3.40 (1.70- 6.79) | 3.09                                 | 1.93                              |
| Other                                                                                              | 2.97 (1.71- 5.17) | 2.84                                 | 1.94                              |

<sup>a</sup>These values were calculated based on the formula for logistic regression

947  
948  
949  
950  
951  
952  
953  
954  
955  
956  
957  
958  
959  
960  
961  
962  
963  
964  
965  
966  
967  
968  
969 **APPENDIX H:**

| <b>Supplement Table IVA: Male patients with breast cancer and COVID-19: Baseline Characteristics</b> |                  |
|------------------------------------------------------------------------------------------------------|------------------|
| <b>Total</b>                                                                                         | <b>25 (100%)</b> |
| <b>Age, years<sup>a</sup></b>                                                                        |                  |
| Median [IQR]                                                                                         | 67.0 [60 - 75]   |
| <b>Race/Ethnicity</b>                                                                                |                  |
| NHW                                                                                                  | 13 (52%)         |
| Black                                                                                                | 8 (32%)          |
| Hispanic                                                                                             | <5 (<20%)        |
| AAPI                                                                                                 | 0 (0%)           |
| Other                                                                                                | <5 (<20%)        |
| <b>Smoking Status</b>                                                                                |                  |
| Never                                                                                                | 18 (72%)         |
| Current or Former                                                                                    | 7 (28%)          |
| <b>Obesity</b>                                                                                       |                  |
| No                                                                                                   | 12 (48%)         |
| Yes                                                                                                  | 13 (52%)         |
| <b>Comorbidities<sup>b</sup></b>                                                                     |                  |
| Cardiovascular                                                                                       | 6 (24%)          |
| Pulmonary                                                                                            | 5 (20%)          |
| Renal Disease                                                                                        | <5 (<20%)        |
| Diabetes mellitus                                                                                    | 11 (44%)         |
| <b>ECOG Performance Status</b>                                                                       |                  |
| 0                                                                                                    | 5 (20%)          |
| 1                                                                                                    | 10 (40%)         |
| 2+                                                                                                   | X*               |
| Unknown                                                                                              | 10 (40%)*        |
| <b>Receptor status</b>                                                                               |                  |
| HR+/HER2-                                                                                            | 18 (72%)         |
| HR+/HER2+                                                                                            | 5 (20%)          |
| HR+/HER2+                                                                                            | X*               |
| Triple Negative                                                                                      | 0 (0%)           |
| Missing/unknown                                                                                      | 2 (8%)*          |
| <b>Cancer Status</b>                                                                                 |                  |
| Remission or NED, >5 years                                                                           | <5 (<20%)        |
| Remission or NED, <5 years                                                                           | 6 (24%)          |
| Active and responding                                                                                | <5 (<20%)        |
| Active and stable                                                                                    | <5 (<20%)        |
| Active and progressing                                                                               | 5 (20%)          |



|                                                                                                         |           |
|---------------------------------------------------------------------------------------------------------|-----------|
| Unknown                                                                                                 | 3 (12%)   |
| <b>Timing of anti-cancer therapy</b>                                                                    |           |
| Never/After COVID-19                                                                                    | <5 (<20%) |
| 0-4 weeks                                                                                               | 17 (68%)  |
| 1-3 months                                                                                              | 0 (0%)    |
| >3 months                                                                                               | <5 (<20%) |
| Missing/unknown                                                                                         | 1 (4%)    |
| <b>Modality of active anti-cancer therapy</b> <sup>b,c</sup>                                            |           |
| None                                                                                                    | 7 (28%)   |
| Chemotherapy                                                                                            | 6 (24%)   |
| Targeted Therapy                                                                                        | 6 (24%)   |
| Endocrine Therapy                                                                                       | 10 (40%)  |
| Immunotherapy                                                                                           | 0 (0%)    |
| Local (Surgery/Radiation)                                                                               | <5 (<20%) |
| Other                                                                                                   | 0 (0%)    |
| Missing/unknown                                                                                         | 1 (4%)    |
| <b>Region</b>                                                                                           |           |
| Northeast                                                                                               | 11 (44%)  |
| Midwest                                                                                                 | <5 (<20%) |
| South                                                                                                   | <5 (<20%) |
| West                                                                                                    | 7 (28%)   |
| Undesignated                                                                                            | 0 (0%)    |
| <b>Period of COVID-19 diagnosis</b>                                                                     |           |
| Jan-Apr 2020                                                                                            | 10 (40%)  |
| May-Aug 2020                                                                                            | 9 (36%)   |
| Sept-Dec 2020                                                                                           | 5 (20%)   |
| <b>Area of patient residence</b>                                                                        |           |
| Urban                                                                                                   | 9 (36%)   |
| Suburban                                                                                                | 8 (32%)   |
| Rural                                                                                                   | 0 (0%)    |
| Missing/unknown                                                                                         | 8 (32%)   |
| <b>Severity of COVID19</b>                                                                              |           |
| Mild                                                                                                    | 11 (44%)  |
| Moderate/Severe                                                                                         | 14 (56%)  |
| <b>*Cells combined to mask N&lt;5 according to CCC19 low count policy</b>                               |           |
| <sup>a</sup> Age was truncated at 90 years.                                                             |           |
| <sup>b</sup> Percentages could sum to >100% because categories are not mutually exclusive.              |           |
| <sup>c</sup> Within 3 months of COVID-19 diagnosis.                                                     |           |
| Variable Categories with one to five cases are masked by replacing with N < 5 according to CCC19 policy |           |

| <b>Suppl Table IVB: Unadjusted rates of outcomes after COVID-19 diagnosis among males with BC</b>                                                                                                                                                                                                                          |           |
|----------------------------------------------------------------------------------------------------------------------------------------------------------------------------------------------------------------------------------------------------------------------------------------------------------------------------|-----------|
| <b>Outcomes</b>                                                                                                                                                                                                                                                                                                            |           |
| Total all-cause mortality                                                                                                                                                                                                                                                                                                  | 5 (20)    |
| 30-day all-cause mortality                                                                                                                                                                                                                                                                                                 | 5 (20)    |
| Received mechanical ventilation                                                                                                                                                                                                                                                                                            | <5 (<20%) |
| Admitted to an intensive care unit                                                                                                                                                                                                                                                                                         | <5 (<20%) |
| Admitted to the hospital                                                                                                                                                                                                                                                                                                   | 15 (60)   |
| <b>Clinical Complications</b>                                                                                                                                                                                                                                                                                              |           |
| Any cardiovascular complication <sup>a</sup>                                                                                                                                                                                                                                                                               | <5 (<20%) |
| Any pulmonary complication <sup>b</sup>                                                                                                                                                                                                                                                                                    | 12 (48)   |
| Any gastrointestinal complication <sup>c</sup>                                                                                                                                                                                                                                                                             | 0 (0%)    |
| Acute kidney injury                                                                                                                                                                                                                                                                                                        | <5 (<20%) |
| Multisystem organ failure                                                                                                                                                                                                                                                                                                  | <5 (<20%) |
| Superimposed infection                                                                                                                                                                                                                                                                                                     | <5 (<20%) |
| Sepsis                                                                                                                                                                                                                                                                                                                     | <5 (<20%) |
| Any bleeding                                                                                                                                                                                                                                                                                                               | <5 (<20%) |
| <b>Interventions</b>                                                                                                                                                                                                                                                                                                       |           |
| Remdesivir                                                                                                                                                                                                                                                                                                                 | <5 (<20%) |
| Hydroxychloroquine                                                                                                                                                                                                                                                                                                         | 7 (28)    |
| Corticosteroids                                                                                                                                                                                                                                                                                                            | <5 (<20%) |
| Other                                                                                                                                                                                                                                                                                                                      | 9 (36)    |
| Supplemental oxygen                                                                                                                                                                                                                                                                                                        | 12 (48)   |
| Variable Categories with one to five cases are masked by replacing with N < 5 according to CCC19 policy                                                                                                                                                                                                                    |           |
| <sup>a</sup> Cardiovascular complication includes hypotension, myocardial infarction, other cardiac ischemia, atrial fibrillation, ventricular fibrillation, other cardiac arrhythmia, cardiomyopathy, congestive heart failure, pulmonary embolism (PE), deep vein thrombosis (DVT), stroke, thrombosis NOS complication. |           |
| <sup>b</sup> Pulmonary complication includes respiratory failure, pneumonitis, pneumonia, acute respiratory distress syndrome (ARDS), PE, pleural effusion, empyema.                                                                                                                                                       |           |
| <sup>c</sup> Gastrointestinal complication includes acute hepatic injury, ascites, bowel obstruction, bowel perforation, ileus, peritonitis                                                                                                                                                                                |           |

972 **APPENDIX I:**

973 **List of Participants by Institution**

974 Alphabetical list of participants by institution that contributed at least one record to the analysis.

975 **Bolded** = site PI/co-PIs; site co-investigators are listed alphabetically by last name.

- 976 • **Balazs Halmos, MD; Amit Verma, MBBS**; Benjamin A. Gartrell, MD; Sanjay Goel, MBBS; Nitin Ohri, MD; R.  
977 Alejandro Sica, MD; Astha Thakkar, MD (Albert Einstein College of Medicine, Montefiore Medical Center, Bronx,  
978 NY, USA)
- 979 • **Keith E. Stockerl-Goldstein, MD**; Omar Butt, MD, PhD; Jian Li Campian, MD, PhD; Mark A. Fiala, MSW;  
980 Jeffrey P. Henderson, MD, PhD; Ryan S. Monahan, MBA; Alice Y. Zhou, MD, PhD (Alvin J. Siteman Cancer  
981 Center at Washington University School of Medicine and Barnes-Jewish Hospital, St. Louis, MO, USA)
- 982 • **Michael A. Thompson, MD, PhD, FASCO**; Pamela Bohachek, RN, CCRC; Daniel Mundt, MD; Mitrianna  
983 Streckfuss, MPH; Eyob Tadesse, MD (Aurora Cancer Care, Advocate Aurora Health, Milwaukee, WI, USA)
- 984 • **Philip E. Lammers, MD, MSCI** (Baptist Cancer Center, Memphis, TN, USA)
- 985 • **Sanjay G. Revankar, MD, FIDSA** (The Barbara Ann Karmanos Cancer Institute at Wayne State University School  
986 of Medicine, Detroit, MI, USA)
- 987 • **Jaymin M. Patel, MD**; Andrew J. Piper-Vallillo, MD; Poorva Bindal, MBBS (Beth Israel Deaconess Medical  
988 Center, Boston, MA, USA)
- 989 • **Orestis A. Panagiotou, MD, PhD**; Pamela C. Egan, MD; Dimitrios Farmakiotis, MD, FACP, FIDSA; Hina Khan,  
990 MD; Adam J. Olszewski, MD (Brown University and Lifespan Cancer Institute, Providence, RI, USA)
- 991 • **Arturo Loaiza-Bonilla, MD, MSED, FACP** (Cancer Treatment Centers of America, AZ/GA/IL/OK/PA, USA)
- 992 • **Salvatore A. Del Prete, MD**; Michael H. Bar, MD, FACP; Anthony P. Gulati, MD; K. M. Steve Lo, MD; Suzanne  
993 J. Rose, MS, PhD, CCRC, FACRP; Jamie Stratton, MD; Paul L. Weinstein, MD (Carl & Dorothy Bennett Cancer  
994 Center at Stamford Hospital, Stamford, CT, USA)
- 995 • **Robin A. Buerki, MD**; Jorge A. Garcia, MD, FACP (Case Comprehensive Cancer Center at Case Western Reserve  
996 University/University Hospitals, Cleveland, OH, USA)
- 997 • **Shilpa Gupta, MD**; Nathan A. Pennell, MD, PhD, FASCO; Manmeet S. Ahluwalia, MD, FACP; Scott J. Dawsey,  
998 MD; Christopher A. Lemmon, MD; Amanda Nizam, MD (Cleveland Clinic, Cleveland, OH, USA)
- 999 • **Claire Hoppenot, MD; Ang Li, MD, MS** (Dan L Duncan Comprehensive Cancer Center at Baylor College of  
1000 Medicine, Houston, TX, USA)
- 1001 • **Toni K. Choueiri, MD**; Ziad Bakouny, MD, MSc; Jean M. Connors, MD; George D. Demetri, MD, FASCO; Dory  
1002 A. Freeman, BS; Antonio Giordano, MD, PhD; Chris Labaki, MD; Alicia K. Morgans, MD, MPH; Anju Nohria,  
1003 MD; Andrew L. Schmidt, MD; Eliezer M. Van Allen, MD; Pier Vitale Nuzzo, MD, PhD; Wenxin (Vincent) Xu,  
1004 MD; Rebecca L. Zon, MD (Dana-Farber Cancer Institute, Boston, MA, USA) (Dana-Farber Cancer Institute,  
1005 Boston, MA, USA)
- 1006 • **Susan Halabi, PhD, FASCO**; Tian Zhang, MD, MHS (Duke Cancer Institute at Duke University Medical Center,  
1007 Durham, NC, USA)
- 1008 • **John C. Leighton Jr, MD, FACP** (Einstein Healthcare Network, Philadelphia, PA, USA)
- 1009 • **Gary H. Lyman, MD, MPH, FASCO, FRCP**; Jerome J. Graber MD, MPH; Petros Grivas, MD, PhD; Elizabeth T.  
1010 Loggers, MD, PhD; Ryan C. Lynch, MD; Elizabeth S. Nakasone, MD, PhD; Michael T. Schweizer, MD; Lisa  
1011 Tachiki, MD; Shaveta Vinayak, MD, MS; Michael J. Wagner, MD; Albert Yeh, MD (Fred Hutchinson Cancer  
1012 Research Center/University of Washington/Seattle Cancer Care Alliance, Seattle, WA, USA)
- 1013 • **Sharad Goyal, MD; Minh-Phuong Huynh-Le, MD, MAS** (George Washington University, Washington, DC,  
1014 USA)
- 1015 • **Lori J. Rosenstein, MD** (Gundersen Health System, WI, USA)
- 1016 • **Peter Paul Yu, MD, FACP, FASCO**; Jessica M. Clement, MD; Ahmad Daher, MD; Mark E. Dailey, MD; Rawad  
1017 Elias, MD; Asha Jayaraj, MD; Emily Hsu, MD; Alvaro G. Menendez, MD; Oscar K. Serrano, MD, MBA, FACS  
1018 (Hartford HealthCare Cancer Institute, Hartford, CT, USA)
- 1019 • **Clara Hwang, MD**; Shirish M. Gadgeel, MD; Sunny R K Singh, MD (Henry Ford Cancer Institute, Henry Ford  
1020 Hospital, Detroit, MI, USA)

- 1021 • **Melissa K. Accordino, MD, MS**; Divaya Bhutani, MD; Jessica E. Hawley, MD; Dawn Hershman, MD, MS,  
1022 FASCO; Gary K. Schwartz, MD (Herbert Irving Comprehensive Cancer Center at Columbia University, New York,  
1023 NY, USA)
- 1024 • **Daniel Y. Reuben, MD, MS**; Mariam Alexander, MD, PhD; Sara Matar, MD; Sarah Mushtaq, MD (Hollings  
1025 Cancer Center at the Medical University of South Carolina, Charleston, SC, USA)
- 1026 • **Eric H. Bernicker, MD** (Houston Methodist Cancer Center, Houston, TX, USA)
- 1027 • **John F. Deeken, MD**; Danielle Shafer, DO (Inova Schar Cancer Institute, Fairfax, VA, USA)
- 1028 • **Mark A. Lewis, MD; Terence D. Rhodes, MD, PhD**; David M. Gill, MD; Clarke A. Low, MD (Intermountain  
1029 Health Care, Salt Lake City, UT, USA)
- 1030 • **Sandeep H. Mashru, MD**; Abdul-Hai Mansoor, MD (Kaiser Permanente Northwest, OR/WA, USA)
- 1031 • **Brandon Hayes-Lattin, MD, FACP**; Aaron M. Cohen, MD, MS; Shannon McWeeney, PhD; Encida R. Nemecek,  
1032 MD, MS, MBA; Staci P. Williamson, BS (Knight Cancer Institute at Oregon Health and Science University,  
1033 Portland, OR, USA)
- 1034 • **Howard A. Zaren, MD, FACS**; Stephanie J. Smith, RN, MSN, OCN (Lewis Cancer & Research Pavilion @ St.  
1035 Joseph's/Candler, Savannah, GA, USA)
- 1036 • **Gayathri Nagaraj, MD**; Mojtaba Akhtari, MD; Eric Lau, DO; Mark E. Reeves, MD, PhD (Loma Linda University  
1037 Cancer Center, Loma Linda, CA, USA)
- 1038 • **Stephanie Berg, DO**; Natalie Knox (Loyola University Medical Center, Maywood, IL, USA)
- 1039 • **Firas H. Wehbe, MD, PhD**; Jessica Altman, MD; Michael Gurley, BA; Mary F. Mulcahy, MD (Lurie Cancer  
1040 Center at Northwestern University, Chicago, IL, USA)
- 1041 • **Eric B. Durbin, DrPH, MS** (Markey Cancer Center at the University of Kentucky, Lexington, KY, USA)
- 1042 • **Amit A. Kulkarni, MD**; Heather H. Nelson, PhD, MPH; Zohar Sachs, MD, PhD (Masonic Cancer Center at the  
1043 University of Minnesota, Minneapolis, MN, USA)
- 1044 • **Rachel P. Rosovsky, MD, MPH; Kerry L. Reynolds, MD**; Aditya Bardia, MD; Genevieve Boland, MD, PhD,  
1045 FACS; Justin F. Gainor, MD; Leyre Zubiri, MD, PhD (Massachusetts General Hospital Cancer Center, Boston, MA,  
1046 USA)
- 1047 • **Thorvardur R. Halfdanarson, MD**; Tanios S. Bekaii-Saab, MD, FACP; Aakash Desai, MD, MPH; Surbhi Shah,  
1048 MD; Zhuoer Xie, MD, MS (Mayo Clinic, AZ/FL/MN, USA) (Mayo Clinic, AZ/FL/MN, USA)
- 1049 • **Ruben A. Mesa, MD, FACP**; Mark Bonnen, MD; Daruka Mahadevan, MD, PhD; Amelie G. Ramirez, DrPH,  
1050 MPH; Mary Salazar, DNP, MSN, RN, ANP-BC; Dimpy P. Shah, MD, PhD; Pankil K. Shah, MD, MSPH (Mays  
1051 Cancer Center at UT Health San Antonio MD Anderson Cancer Center, San Antonio, TX, USA)
- 1052 • **Gregory J. Riely, MD, PhD; Elizabeth V. Robilotti MD, MPH**; Rimma Belenkaya, MA, MS; John Philip, MS  
1053 (Memorial Sloan Kettering Cancer Center, New York, NY, USA)
- 1054 • **Bryan Faller, MD** (Missouri Baptist Medical Center, St. Louis, MO, USA)
- 1055 • **Rana R. McKay, MD**; Archana Ajmera, MSN, ANP-BC, AOCNP; Sharon S. Brouha, MD, MPH; Angelo Cabal,  
1056 BS; Sharon Choi, MD, PhD; Albert Hsiao, MD, PhD; Jun Yang Jiang, MD; Seth Kligerman, MD; Taylor K.  
1057 Nonato; Erin G. Reid, MD (Moores Comprehensive Cancer Center at the University of California, San Diego, La  
1058 Jolla, CA, USA)
- 1059 • **Lisa B. Weissmann, MD**; Chinmay Jani, MD; Carey C. Thomson, MD, FCCP, MPH (Mount Auburn Hospital,  
1060 Cambridge, MA, USA)
- 1061 • **Jeanna Knoble, MD**; Mary Grace Glace, RN; Cameron Rink, PhD, MBA; Karen Stauffer, RN; Rosemary Zacks,  
1062 RN (Mount Carmel Health System, Columbus, OH, USA)
- 1063 • **Sibel Blau, MD** (Northwest Medical Specialties, Tacoma, WA, USA)
- 1064 • **Daniel G. Stover, MD**; Daniel Addison, MD; James L. Chen, MD; Margaret E. Gatti-Mays, MD; Sachin R. Jhavar,  
1065 MD; Vidhya Karivedu, MBBS; Joshua D. Palmer, MD; Sarah Wall, MD; Nicole O. Williams, MD (The Ohio State  
1066 University Comprehensive Cancer Center, Columbus, OH, USA)
- 1067 • **Monika Joshi, MD, MRCP**; Hyma V. Polimera, MD; Lauren D. Pomerantz; Marc A. Rovito, MD, FACP (Penn  
1068 State Health/Penn State Cancer Institute/St. Joseph Cancer Center, PA, USA)
- 1069 • **Elizabeth A. Griffiths, MD**; Amro Elshoury, MBCh (Roswell Park Comprehensive Cancer Center, Buffalo, NY,  
1070 USA)
- 1071 • **Salma K. Jabbour, MD**; Christian F. Misdary, MD; Mansi R. Shah, MD (Rutgers Cancer Institute of New Jersey at  
1072 Rutgers Biomedical and Health Sciences, New Brunswick, NJ, USA)
- 1073 • **Babar Bashir, MD, MS**; Christopher McNair, PhD; Sana Z. Mahmood, BA, BS; Vasil Mico, BS; Andrea Verghese  
1074 Rivera, MD (Sidney Kimmel Cancer Center at Thomas Jefferson University, Philadelphia, PA, USA)

- 1075 • **Sumit A. Shah, MD, MPH**; Elwyn C. Cabebe, MD; Michael J. Glover, MD; Alok Kumar Jha, PhD; Ali Raza Khaki,  
1076 MD; Lidia Schapira, MD, FASCO; Julie Tsu-Yu Wu, MD, PhD (Stanford Cancer Institute at Stanford University,  
1077 Palo Alto, CA, USA)
- 1078 • **Suki Subbiah, MD** (Stanley S. Scott Cancer Center at LSU Health Sciences Center, New Orleans, LA, USA)
- 1079 • **Daniel B. Flora, MD, PharmD**; Goetz Kloecker, MD; Barbara B. Logan, MS; Chaitanya Mandapakala, MD (St.  
1080 Elizabeth Healthcare, Edgewood, KY, USA)
- 1081 • **Gilberto de Lima Lopes Jr., MD, MBA, FAMS, FASCO** (Sylvester Comprehensive Cancer Center at the  
1082 University of Miami Miller School of Medicine, Miami, FL, USA)
- 1083 • **Karen Russell, MD, FACP**; Brittany Stith, RN, BSN, OCN, CCRP (Tallahassee Memorial Healthcare, Tallahassee,  
1084 FL, USA)
- 1085 • **Natasha C. Edwin, MD**; Melissa Smits, APC (ThedaCare Cancer Care, Appleton, WI, USA)
- 1086 • **David D. Chism, MD**; Susie Owenby, RN, CCRP (Thompson Cancer Survival Center, Knoxville, TN, USA)
- 1087 • **Deborah B. Doroshow, MD, PhD**; Matthew D. Galsky, MD; Michael Wotman, MD (Tisch Cancer Institute at the  
1088 Icahn School of Medicine at Mount Sinai, New York, NY, USA)
- 1089 • **Julie C. Fu, MD**; Alyson Fazio, APRN-BC; Kathryn E. Huber, MD; Mark H. Sueyoshi, MD (Tufts Medical Center  
1090 Cancer Center, Boston and Stoneham, MA, USA)
- 1091 • **Jonathan Riess, MD, MS**; Kanishka G. Patel, MD (UC Davis Comprehensive Cancer Center at the University of  
1092 California at Davis, CA, USA)
- 1093 • **Vadim S. Koshkin, MD**; Hala T. Borno, MD; Daniel H. Kwon, MD; Eric J. Small, MD; Sylvia Zhang, MS (UCSF  
1094 Helen Diller Family Comprehensive Cancer Center at the University of California at San Francisco, CA, USA)
- 1095 • **Samuel M. Rubinstein, MD; William A. Wood, MD, MPH**; Christopher Jensen, MD (UNC Lineberger  
1096 Comprehensive Cancer Center, Chapel Hill, NC, USA)
- 1097 • **Trisha M. Wise-Draper, MD, PhD**; Syed A. Ahmad, MD, FACS; Punita Grover, MD; Shuchi Gulati, MD; Jordan  
1098 Kharofa, MD; Tahir Latif, MBBS, MBA; Michelle Marcum, MS; Hira G. Shaikh, MD (University of Cincinnati  
1099 Cancer Center, Cincinnati, OH, USA)
- 1100 • **Daniel W. Bowles, MD**; Christopher L. Geiger, MD (University of Colorado Cancer Center, Aurora, CO, USA)
- 1101 • **Merry-Jennifer Markham, MD, FACP, FASCO**; Atlantis D. Russ, MD, PhD; Haneen Saker, MD (University of  
1102 Florida Health Cancer Center, Gainesville, FL, USA)
- 1103 • **Jared D. Acoba, MD**; Young Soo Rho, MD, CM (University of Hawai'i Cancer Center, Honolulu, HI, USA)
- 1104 • **Lawrence E. Feldman, MD; Kent F. Hoskins, MD**; Gerald Gantt Jr., MD; Li C. Liu, PhD; Mahir Khan, MD;  
1105 Ryan H. Nguyen, DO; Mary Pasquinelli, APN, DNP; Candice Schwartz, MD; Neeta K. Venepalli, MD, MBA  
1106 (University of Illinois Hospital & Health Sciences System, Chicago, IL, USA)
- 1107 • **Praveen Vikas, MD** (University of Iowa Holden Comprehensive Cancer Center, Iowa City, IA, USA)
- 1108 • **Elizabeth Wulff-Burchfield, MD**; Anup Kasi MD, MPH (The University of Kansas Cancer Center, Kansas City,  
1109 KS, USA)
- 1110 • **Christopher R. Friese, PhD, RN, AOCN, FAAN; Leslie A. Fecher, MD** (University of Michigan Rogel Cancer  
1111 Center, Ann Arbor, MI, USA)
- 1112 • **Blanche H. Mavromatis, MD**; Ragneel R. Bijjula, MD; Qamar U. Zaman, MD (UPMC Western Maryland,  
1113 Cumberland, MD, USA)
- 1114 • **Jeremy L. Warner, MD, MS, FAMIA, FASCO**; Alaina J. Brown, MD, MPH; Alicia Beeghly-Fadiel, PhD; Alex  
1115 Cheng, PhD; Sarah Croessmann, PhD; Elizabeth J. Davis, MD; Stephany N. Duda, PhD, MS; Kyle T. Enriquez,  
1116 MSc BS; Benjamin French, PhD; Erin A. Gillaspie, MD, MPH; Daniel Hausrath, MD; Cassandra Hennessy, MS;  
1117 Chih-Yuan Hsu, PhD; Douglas B. Johnson, MD, MSCI; Xuanyi Li, BA; Sanjay Mishra, MS, PhD; Sonya A. Reid,  
1118 MD, MPH; Brian I. Rini, MD, FACP, FASCO; Yu Shyr, PhD; David A. Slosky, MD; Carmen C. Solorzano, MD,  
1119 FACS; Tianyi Sun, MS; Matthew D. Tucker, MD; Karen Vega-Luna, MA; Lucy L. Wang, BA (Vanderbilt-Ingram  
1120 Cancer Center at Vanderbilt University Medical Center, Nashville, TN, USA)
- 1121 • **David M. Aboulafia, MD**; Brett A. Schroeder, MD (Virginia Mason Cancer Institute, Seattle, WA, USA)
- 1122 • **Matthew Puc, MD**; Theresa M. Carducci, MSN, RN, CCRP; Karen J. Goldsmith, BSN, RN; Susan Van Loon, RN,  
1123 CTR, CCRP (Virtua Health, Marlton, NJ, USA)
- 1124 • **Umit Topaloglu, PhD, FAMIA**; Saif I. Alimohamed, MD (Wake Forest Baptist Comprehensive Cancer Center,  
1125 Winston-Salem, NC, USA)
- 1126 • **Robert L. Rice, MD, PhD** (WellSpan Health, York, PA, USA)
- 1127 • **Prakash Peddi, MD; Lane R. Rosen, MD**; Briana Barrow McCollough, BSc, CCRC (Willis-Knighton Cancer  
1128 Center, Shreveport, LA, USA)

- 1129
- 1130
- 1131
- 1132
- 1133
- 1134
- **Mehmet A. Bilen, MD**; Cecilia A. Castellano; Deepak Ravindranathan, MD, MS (Winship Cancer Institute of Emory University, Atlanta, GA, USA)
  - **Navid Hafez, MD, MPH**; Roy Herbst, MD, PhD; Patricia LoRusso, DO, PhD; Maryam B. Lustberg, MD, MPH; Tyler Masters, MS; Catherine Stratton, BA (Yale Cancer Center at Yale University School of Medicine, New Haven, CT, USA) (Yale Cancer Center at Yale University School of Medicine, New Haven, CT, USA)
